# Supplementary material for: Quality Attributes and Metabolic Profiles of Uvaia (Eugenia pyriformis), a Native Brazilian Atlantic Forest Fruit
Source: MDPI journal article supplement (doi:10.3390/foods12091881), 2023-05-03
Supplement: s1 [file s1]

---

Article

# Quality Attributes and Metabolic Profiles of Uvaia (*Eugenia pyriformis*), a Native Brazilian Atlantic Forest Fruit

Poliana Cristina Spricigo <sup>1,2</sup>, Luísa Souza Almeida <sup>3</sup>, Gabriel Henrique Ribeiro <sup>4</sup>, Banny Silva Barbosa Correia <sup>3,5</sup>, Isabela Barroso Taver <sup>1</sup>, Angelo Pedro Jacomino <sup>1,\*</sup> and Luiz Alberto Colnago <sup>4</sup>

<sup>1</sup> Luiz de Queiroz College of Agriculture, University of São Paulo, 11 Pádua Dias Ave., Piracicaba 13418-900, São Paulo, Brazil; polianaspricigo@usp.br (P.C.S.)

<sup>2</sup> School of Agricultural and Veterinarian Sciences, São Paulo State University, Jaboticabal 14884-900, São Paulo, Brazil

<sup>3</sup> Institute of Chemistry of São Carlos, University of São Paulo, 400 Trabalhador São Carlense Ave., São Carlos 13566-590, São Paulo, Brazil

<sup>4</sup> Embrapa Instrumentation, 1452 XV de Novembro Street, São Carlos 13560-970, São Paulo, Brazil; luiz.colnago@embrapa.br (L.A.C.)

<sup>5</sup> Department of Food Science, Aarhus University, 48 Agro Food Park, Aarhus 8200, Jutland, Denmark

\* Correspondence: jacomino@usp.br

**Table S1.** Physicochemical uvaia characteristics– 2020 harvest.

|    | <i>Accession</i> | <i>Height (mm)</i> | <i>Diameter. (mm)</i> | <i>Fresh mass (g)</i> | <i>Seed mass (g)</i> | <i>Yield.</i> | <i>TSS</i>   | <i>TTA</i>  |
|----|------------------|--------------------|-----------------------|-----------------------|----------------------|---------------|--------------|-------------|
| 1  | UV016            | 16.21 ± 0.16       | 20.83 ± 0.77          | 4.80 ± 0.23           | 1.26 ± 0.20          | 74.13 ± 2.62  | 10.08 ± 0.60 | 1.69 ± 0.12 |
| 2  | UV022            | 24.83 ± 0.89       | 30.22 ± 2.16          | 13.85 ± 0.56          | 4.26 ± 0.49          | 70.91 ± 2.42  | 8.12 ± 0.35  | 1.48 ± 0.03 |
| 3  | UV027            | 17.96 ± 0.62       | 21.11 ± 0.34          | 5.41 ± 0.15           | 1.19 ± 0.13          | 78.30 ± 2.00  | 12.73 ± 0.33 | 2.08 ± 0.09 |
| 4  | UV028            | 22.08 ± 0.07       | 26.18 ± 0.40          | 8.91 ± 0.13           | 1.34 ± 0.13          | 85.07 ± 1.24  | 15.30 ± 0.46 | 1.39 ± 0.22 |
| 5  | UV029            | 26.38 ± 0.62       | 33.82 ± 0.70          | 14.18 ± 0.71          | 3.46 ± 0.86          | 75.94 ± 6.11  | 7.52 ± 0.21  | 1.25 ± 0.30 |
| 6  | UV030            | 20.67 ± 0.59       | 25.09 ± 0.07          | 12.88 ± 2.17          | 1.24 ± 0.06          | 89.95 ± 1.19  | 13.92 ± 0.56 | 1.00 ± 0.14 |
| 7  | UV036            | 19.20 ± 0.58       | 19.51 ± 0.19          | 4.29 ± 0.27           | 1.26 ± 0.12          | 70.79 ± 1.62  | 8.73 ± 0.34  | 1.10 ± 0.11 |
| 8  | UV037            | 24.11 ± 0.34       | 28.03 ± 0.18          | 10.28 ± 0.54          | 2.48 ± 0.12          | 75.92 ± 1.80  | 8.40 ± 0.13  | 1.06 ± 0.11 |
| 9  | UV039            | 20.30 ± 0.60       | 25.51 ± 1.03          | 6.83 ± 0.26           | 1.10 ± 0.05          | 84.04 ± 1.16  | 6.57 ± 0.13  | 0.95 ± 0.09 |
| 10 | UV040            | 24.99 ± 0.98       | 30.36 ± 0.63          | 11.64 ± 0.48          | 1.73 ± 0.16          | 85.58 ± 1.35  | 12.07 ± 0.40 | 1.29 ± 0.08 |
| 11 | UV041            | 23.12 ± 0.68       | 25.80 ± 0.35          | 9.30 ± 0.30           | 2.89 ± 0.20          | 69.24 ± 2.54  | 8.42 ± 0.30  | 1.36 ± 0.22 |
| 12 | UV042            | 19.92 ± 1.02       | 24.05 ± 0.25          | 6.51 ± 0.27           | 1.15 ± 0.08          | 82.53 ± 0.79  | 9.10 ± 0.26  | 1.22 ± 0.02 |
| 13 | UV043            | 20.92 ± 0.70       | 25.50 ± 0.30          | 6.65 ± 0.77           | 1.48 ± 0.14          | 64.87 ± 25.7  | 8.72 ± 0.48  | 1.10 ± 0.36 |
| 14 | UV046            | 21.94 ± 1.49       | 23.69 ± 1.66          | 7.44 ± 0.95           | 2.26 ± 0.62          | 70.72 ± 4.23  | 10.02 ± 0.21 | 2.02 ± 0.13 |
| 15 | UV047            | 23.82 ± 0.78       | 27.04 ± 0.59          | 9.92 ± 0.70           | 1.56 ± 0.32          | 84.06 ± 3.62  | 12.30 ± 0.83 | 1.11 ± 0.11 |
| 16 | UV048            | 18.59 ± 0.49       | 21.65 ± 0.52          | 5.55 ± 0.82           | 1.40 ± 0.21          | 74.60 ± 2.32  | 10.27 ± 0.70 | 2.31 ± 0.19 |
| 17 | UV049            | 26.16 ± 0.65       | 30.21 ± 0.25          | 13.14 ± 0.27          | 3.18 ± 0.03          | 76.35 ± 0.21  | 8.95 ± 0.35  | 2.26 ± 0.13 |
| 18 | UV050            | 20.49 ± 0.46       | 23.67 ± 0.98          | 6.54 ± 0.54           | 2.15 ± 0.93          | 65.95 ± 1.05  | 8.62 ± 0.36  | 1.47 ± 0.09 |
| 19 | UV052            | 25.56 ± 1.33       | 31.99 ± 0.32          | 12.92 ± 0.28          | 2.42 ± 0.13          | 81.39 ± 0.76  | 7.28 ± 0.24  | 0.83 ± 0.39 |
| 20 | UV056            | 21.50 ± 1.58       | 24.65 ± 0.86          | 7.75 ± 0.85           | 1.50 ± 0.10          | 80.76 ± 1.10  | 9.12 ± 0.43  | 1.47 ± 0.07 |
| 21 | UV057            | 20.19 ± 0.63       | 26.24 ± 0.04          | 7.36 ± 0.36           | 1.14 ± 0.14          | 84.70 ± 1.26  | 8.13 ± 0.15  | 1.18 ± 0.03 |
| 22 | UV058            | 24.97 ± 1.58       | 28.03 ± 1.70          | 12.46 ± 1.41          | 3.45 ± 0.72          | 73.51 ± 2.25  | 7.58 ± 0.46  | 1.27 ± 0.29 |
| 23 | UV059            | 20.09 ± 0.54       | 24.90 ± 0.57          | 7.46 ± 0.19           | 1.53 ± 0.25          | 79.65 ± 3.43  | 8.98 ± 0.23  | 1.38 ± 0.27 |
| 24 | UV060            | 20.00 ± 0.44       | 23.19 ± 1.31          | 6.81 ± 0.57           | 1.15 ± 0.11          | 83.10 ± 0.22  | 11.38 ± 0.25 | 2.07 ± 0.07 |

---

|    |       |              |              |              |             |              |              |             |
|----|-------|--------------|--------------|--------------|-------------|--------------|--------------|-------------|
| 25 | UV062 | 28.17 ± 0.66 | 32.03 ± 6.42 | 26.23 ± 7.27 | 3.96 ± 1.27 | 85.60 ± 1.05 | 10.43 ± 0.32 | 1.69 ± 0.03 |
| 26 | UV067 | 19.81 ± 0.72 | 23.88 ± 0.79 | 7.61 ± 0.22  | 1.06 ± 0.14 | 86.20 ± 1.72 | 10.20 ± 0.23 | 1.49 ± 0.08 |
| 27 | UV068 | 32.62 ± 0.80 | 41.17 ± 0.74 | 27.90 ± 1.61 | 5.47 ± 1.45 | 80.47 ± 6.67 | 10.20 ± 0.17 | 1.03 ± 0.11 |
| 28 | UV069 | 21.39 ± 1.12 | 24.00 ± 0.33 | 8.08 ± 0.65  | 2.58 ± 0.27 | 69.27 ± 2.81 | 10.45 ± 0.13 | 3.48 ± 0.04 |
| 29 | UV072 | 19.10 ± 0.39 | 24.97 ± 0.37 | 6.59 ± 0.29  | 1.82 ± 0.21 | 72.99 ± 1.16 | 5.98 ± 0.25  | 1.77 ± 0.04 |
| 30 | UV073 | 30.09 ± 0.98 | 34.94 ± 0.71 | 18.19 ± 1.62 | 3.02 ± 0.19 | 83.45 ± 0.71 | 10.53 ± 0.38 | 3.46 ± 0.04 |
| 31 | UV075 | 26.74 ± 0.60 | 31.25 ± 0.46 | 13.63 ± 0.69 | 4.05 ± 0.10 | 70.33 ± 0.76 | 10.38 ± 0.57 | 3.13 ± 0.02 |
| 32 | UV076 | 20.06 ± 0.45 | 24.59 ± 1.01 | 6.79 ± 0.48  | 1.91 ± 0.38 | 72.49 ± 3.85 | 8.77 ± 0.58  | 3.58 ± 0.04 |
| 33 | UV088 | 24.05 ± 0.50 | 28.82 ± 0.26 | 11.12 ± 0.09 | 4.24 ± 0.57 | 61.95 ± 4.94 | 5.87 ± 0.21  | 3.17 ± 0.02 |
| 34 | UV089 | 21.40 ± 0.31 | 26.93 ± 0.48 | 7.40 ± 0.40  | 1.54 ± 0.10 | 79.37 ± 1.66 | 9.50 ± 0.71  | 3.08 ± 0.08 |
| 35 | UV112 | 22.11 ± 0.35 | 26.91 ± 0.61 | 9.22 ± 0.22  | 1.60 ± 0.16 | 82.65 ± 2.13 | 8.92 ± 0.32  | 2.85 ± 0.03 |
| 36 | UV114 | 20.03 ± 0.66 | 24.39 ± 1.01 | 6.64 ± 0.18  | 0.84 ± 0.16 | 87.59 ± 1.49 | 10.17 ± 0.42 | 3.16 ± 0.07 |
| 37 | UV116 | 22.79 ± 1.06 | 29.55 ± 1.05 | 13.81 ± 0.36 | 2.72 ± 0.55 | 80.37 ± 4.55 | 9.55 ± 0.28  | 3.01 ± 0.19 |
| 38 | UV120 | 20.50 ± 0.50 | 24.19 ± 0.72 | 7.45 ± 0.24  | 1.47 ± 0.08 | 80.79 ± 0.64 | 9.05 ± 0.22  | 2.87 ± 0.05 |
| 39 | UV122 | 22.42 ± 0.61 | 24.91 ± 0.50 | 9.37 ± 0.75  | 2.08 ± 0.07 | 77.09 ± 3.02 | 9.78 ± 0.32  | 1.65 ± 0.02 |
| 40 | UV125 | 21.40 ± 0.56 | 24.24 ± 0.45 | 6.85 ± 0.25  | 1.26 ± 0.12 | 81.58 ± 1.39 | 10.28 ± 0.20 | 3.70 ± 0.06 |
| 41 | UV146 | 25.62 ± 0.90 | 28.14 ± 1.40 | 10.49 ± 0.62 | 1.81 ± 0.08 | 82.59 ± 1.64 | 11.17 ± 0.23 | 3.13 ± 0.05 |

---

Accession identification codes: UV = uvaia, three-digit number = accession identification. Results expressed as means + standard deviations. TSS: total soluble solids (°Brix); TTA: total titratable acidity (% citric acid eq).

**Table S2.** 2D structure of identified uvaia metabolites.

| <i>Sugar and related compounds</i> |                                                                                     | <i>Acids and related compounds</i> |                                                                                     | <i>Aminoacids and related compounds</i> |                                                                                       |
|------------------------------------|-------------------------------------------------------------------------------------|------------------------------------|-------------------------------------------------------------------------------------|-----------------------------------------|---------------------------------------------------------------------------------------|
| <i>Sucrose</i>                     | 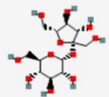   | <i>Citrate</i>                     |    | <i>Alanine</i>                          |    |
| <i>Glucose</i>                     |    | <i>Malate</i>                      |    | <i>Arginine</i>                         |    |
| <i>Fructose</i>                    |    | <i>Gallate</i>                     |    | <i>Asparagine</i>                       |    |
| <i>Ethanol</i>                     |    | <i>Succinate</i>                   |    | <i>Choline</i>                          |    |
| <i>Methanol</i>                    |    | <i>4-Aminobutyrate</i>             |    | <i>Glutamine</i>                        |   |
| <i>Uridine</i>                     |  | <i>Cinnamate</i>                   |  | <i>Isoleucine</i>                       |  |
|                                    |                                                                                     | <i>Formate</i>                     |  | <i>Leucine</i>                          |  |
|                                    |                                                                                     | <i>Acetamide</i>                   |  | <i>Phenylalanine</i>                    |  |
|                                    |                                                                                     |                                    |                                                                                     | <i>Proline</i>                          |  |
|                                    |                                                                                     |                                    |                                                                                     | <i>Serine</i>                           |  |
|                                    |                                                                                     |                                    |                                                                                     | <i>Threonine</i>                        |  |
|                                    |                                                                                     |                                    |                                                                                     | <i>Tyrosine</i>                         |  |
|                                    |                                                                                     |                                    |                                                                                     | <i>Valine</i>                           |  |

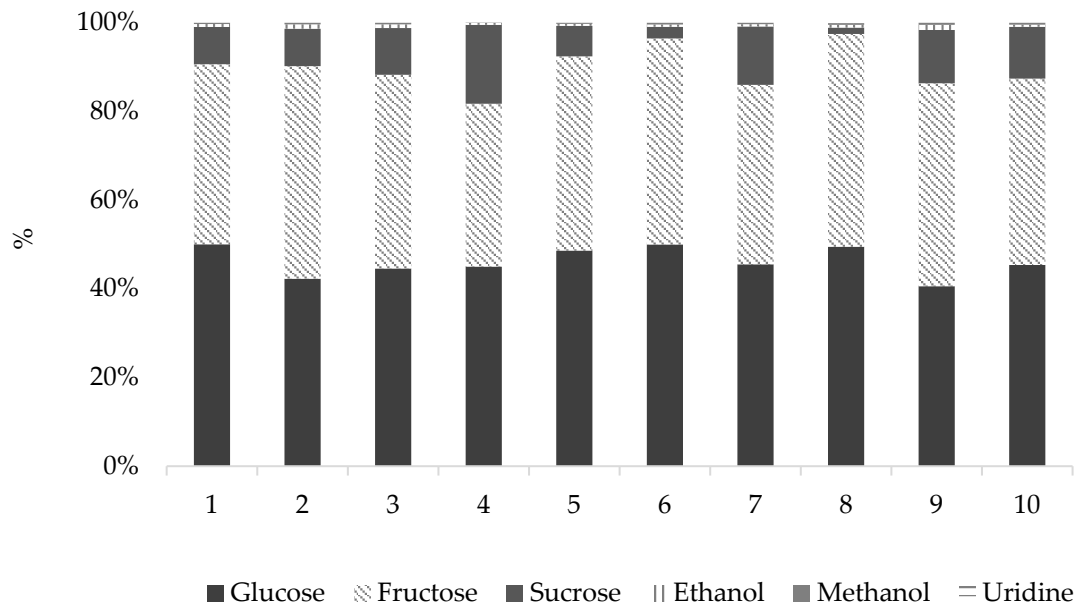

**Figure S1.** Sugar and related compounds content found in 10 selected uvaia accessions.

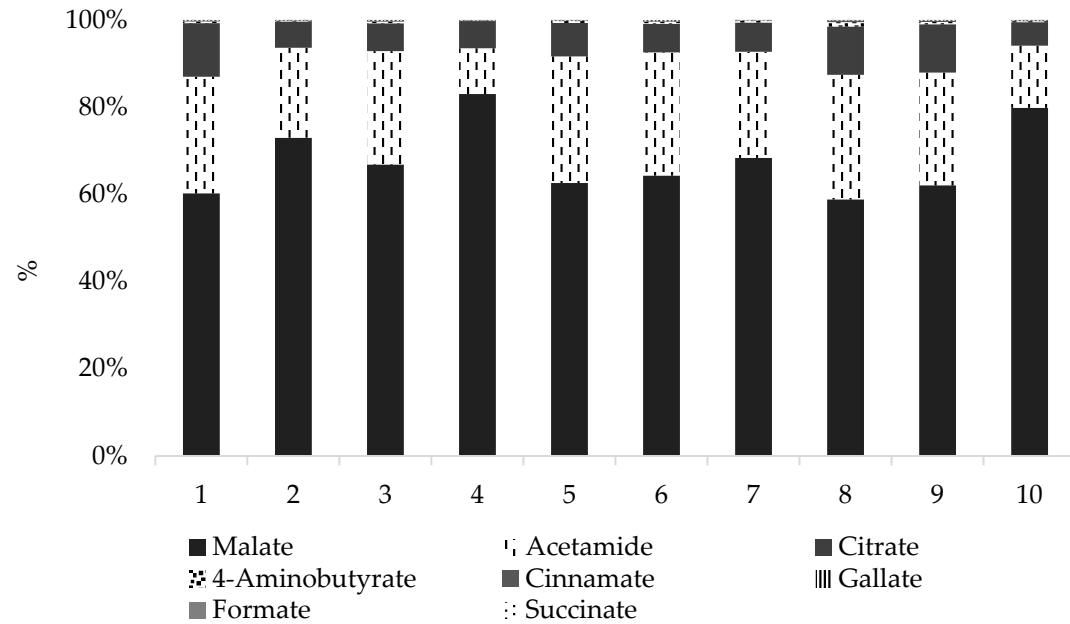

**Figure S2.** Acids and related compounds content found in 10 selected uvaia accessions.

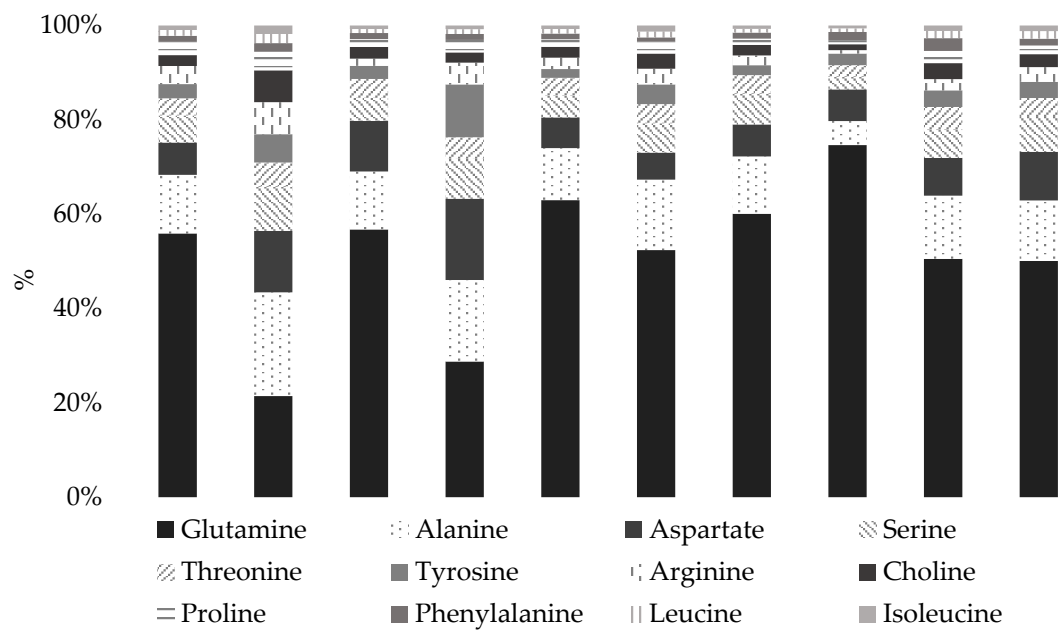

**Figure S3.** Amino acids and related compounds content found in 10 selected uvaia accessions.

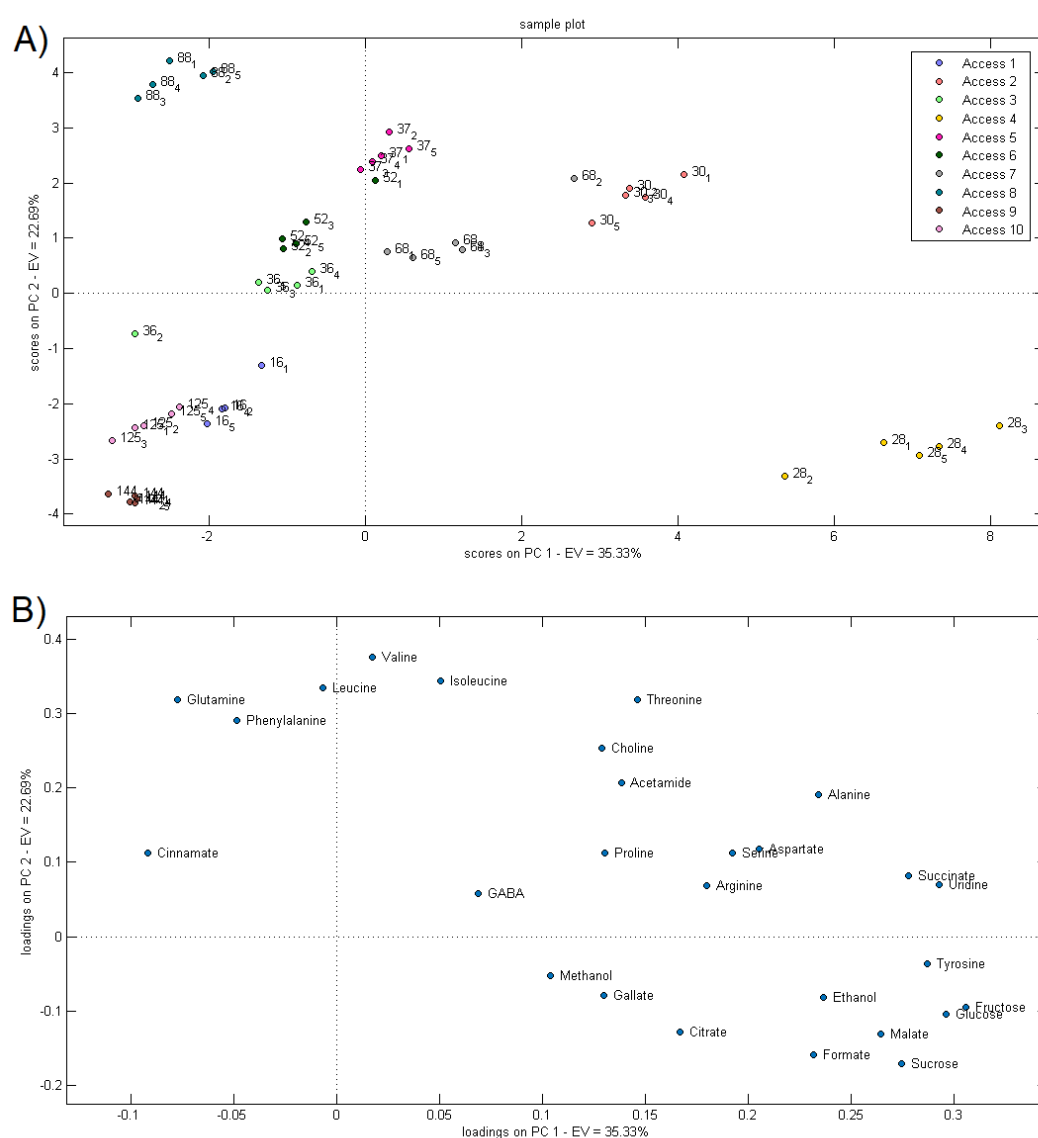

**Figure S4.** Principal component analysis (A) scores and (B) loadings concerning uvaia quality attributes according to metabolites identified by NMR.

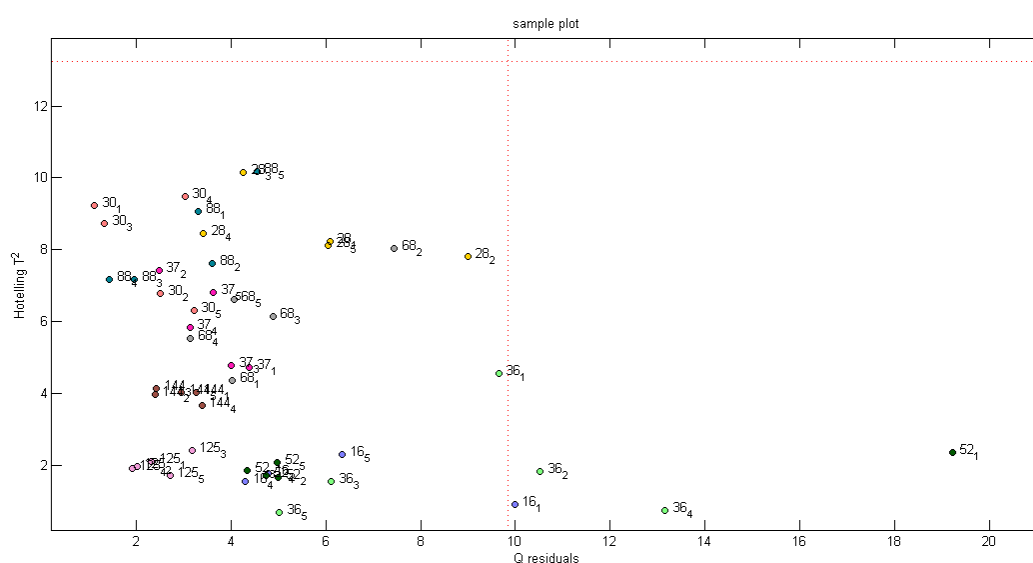

**Figure S5.** Plot of Q residuals x Hotelling of  $T^2$ . Indicates whether the samples grouped in the PCA have residuals (high values on the x axis) which would indicate that they were not well explained by the PCs and also specify whether they are samples with more than 2 standard deviations (y axis) deviating from the characteristics of the larger group. Samples presenting high residue and  $T^2$  values are considered outliers.

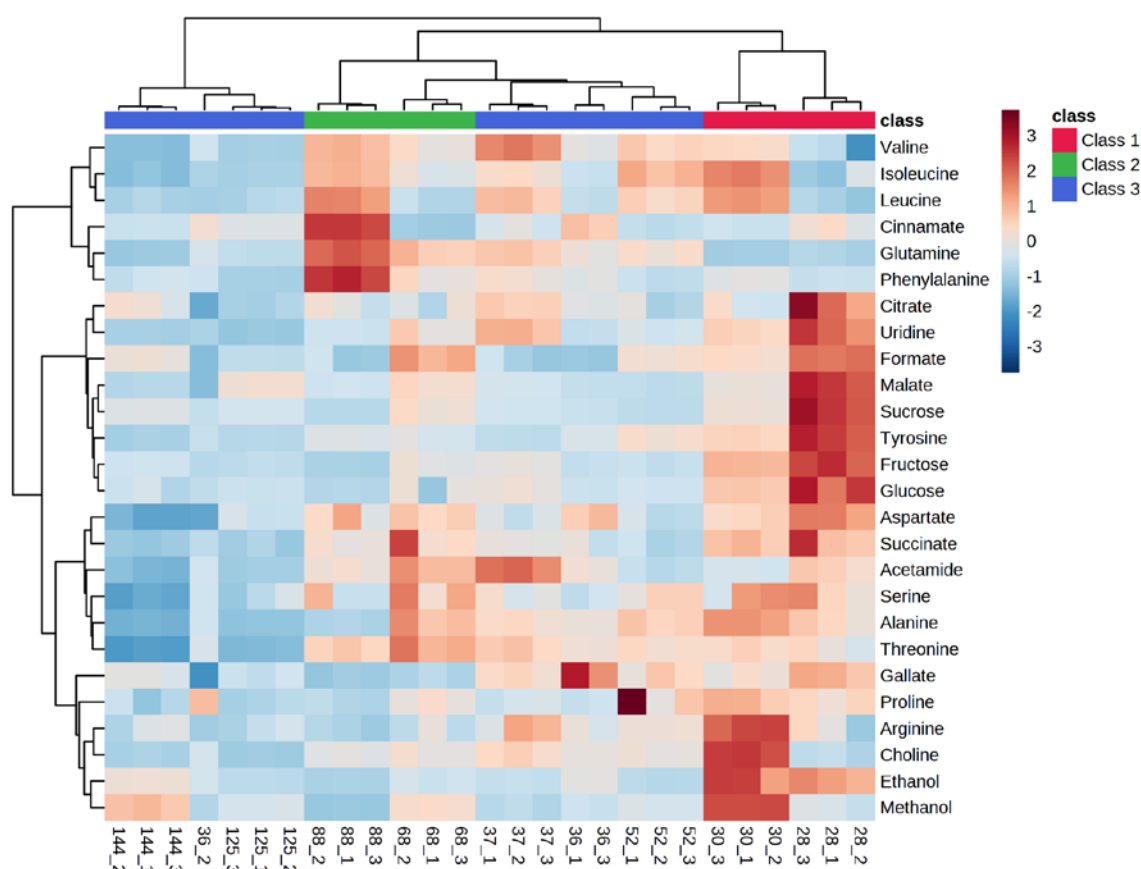

**Figure S6.** Class heatmaps. Class 1: SS, Y Accessions 2, and 4; Class 2: S, FW, D and H Accessions 7 and 8; Class 3: TA Accessions 3, 5, 6, 9, 10.



**Table S3.** Uvaia classifications according to their physicochemical characteristics - Class 1: SS, Y. Accession 2, and 4.

|    |                                                     | Total Cmpd | Hits | Raw p      | _ $-\text{LOG}_{10}(\text{p})$ | Holm adjust | FDR        | Impact  |
|----|-----------------------------------------------------|------------|------|------------|--------------------------------|-------------|------------|---------|
| 1  | Isoquinoline alkaloid biosynthesis                  | 6          | 1    | 4.10E-07   | 6.3869                         | 1.48E-05    | 2.61E-06   | 0.5     |
| 2  | Phenylalanine metabolism                            | 11         | 1    | 0.3835     | 0.41624                        | 1           | 0.41637    | 0.47059 |
| 3  | Alanine, aspartate and glutamate metabolism         | 22         | 4    | 6.67E-05   | 4.1761                         | 0.0017335   | 0.00017179 | 0.32014 |
| 4  | Citrate cycle (TCA cycle)                           | 20         | 3    | 6.78E-05   | 4.1687                         | 0.0017335   | 0.00017179 | 0.18889 |
| 5  | Arginine and proline metabolism                     | 34         | 2    | 0.003544   | 2.4505                         | 0.048245    | 0.0051797  | 0.17461 |
| 6  | Pyruvate metabolism                                 | 22         | 1    | 6.75E-05   | 4.1706                         | 0.0017335   | 0.00017179 | 0.15462 |
| 7  | Glycine, serine and threonine metabolism            | 33         | 3    | 0.0061796  | 2.209                          | 0.074155    | 0.0086972  | 0.1204  |
| 8  | Tyrosine metabolism                                 | 16         | 1    | 4.10E-07   | 6.3869                         | 1.48E-05    | 2.61E-06   | 0.10811 |
| 9  | Starch and sucrose metabolism                       | 22         | 1    | 1.14E-05   | 4.9427                         | 0.00033088  | 3.94E-05   | 0.0889  |
| 10 | Arginine biosynthesis                               | 18         | 3    | 1.37E-06   | 5.863                          | 4.39E-05    | 7.44E-06   | 0.08447 |
| 11 | Glyoxylate and dicarboxylate metabolism             | 29         | 5    | 6.46E-06   | 5.1898                         | 0.00019381  | 2.73E-05   | 0.06741 |
| 12 | Carbon fixation in photosynthetic organisms         | 21         | 3    | 5.18E-05   | 4.2856                         | 0.0013988   | 0.00016406 | 0.05846 |
| 13 | Galactose metabolism                                | 27         | 1    | 1.14E-05   | 4.9427                         | 0.00033088  | 3.94E-05   | 0.04252 |
| 14 | Sulfur metabolism                                   | 15         | 1    | 0.00098609 | 3.0061                         | 0.020708    | 0.0018736  | 0.03315 |
| 15 | Pyrimidine metabolism                               | 38         | 2    | 4.12E-07   | 6.3849                         | 1.48E-05    | 2.61E-06   | 0.03089 |
| 16 | Glycerophospholipid metabolism                      | 37         | 1    | 0.012865   | 1.8906                         | 0.10292     | 0.01577    | 0.03075 |
| 17 | Phenylalanine, tyrosine and tryptophan biosynthesis | 22         | 2    | 3.08E-06   | 5.5118                         | 9.54E-05    | 1.46E-05   | 0.02152 |
| 18 | Glycolysis / Gluconeogenesis                        | 26         | 2    | 4.07E-14   | 13.39                          | 1.55E-12    | 1.55E-12   | 0.00038 |
| 19 | Amino sugar and nucleotide sugar metabolism         | 50         | 1    | 1.97E-10   | 9.7049                         | 7.30E-09    | 3.75E-09   | 0       |
| 20 | Ubiquinone and other terpenoid-quinone biosynthesis | 38         | 1    | 4.10E-07   | 6.3869                         | 1.48E-05    | 2.61E-06   | 0       |
| 21 | Nitrogen metabolism                                 | 12         | 2    | 0.00016489 | 3.7828                         | 0.0037926   | 0.00039162 | 0       |
| 22 | Aminoacyl-tRNA biosynthesis                         | 46         | 11   | 0.00064081 | 3.1933                         | 0.014098    | 0.0014324  | 0       |
| 23 | Propanoate metabolism                               | 20         | 1    | 0.00098609 | 3.0061                         | 0.020708    | 0.0018736  | 0       |
| 24 | Butanoate metabolism                                | 17         | 1    | 0.00098609 | 3.0061                         | 0.020708    | 0.0018736  | 0       |
| 25 | Monobactam biosynthesis                             | 8          | 1    | 0.0026803  | 2.5718                         | 0.048245    | 0.0040741  | 0       |
| 26 | Cysteine and methionine metabolism                  | 46         | 1    | 0.0026803  | 2.5718                         | 0.048245    | 0.0040741  | 0       |
| 27 | Lysine biosynthesis                                 | 9          | 1    | 0.0026803  | 2.5718                         | 0.048245    | 0.0040741  | 0       |

---

|    |                                                        |    |   |           |         |          |           |   |
|----|--------------------------------------------------------|----|---|-----------|---------|----------|-----------|---|
| 28 | beta-Alanine metabolism                                | 18 | 1 | 0.0026803 | 2.5718  | 0.048245 | 0.0040741 | 0 |
| 29 | Nicotinate and nicotinamide metabolism                 | 13 | 1 | 0.0026803 | 2.5718  | 0.048245 | 0.0040741 | 0 |
| 30 | Purine metabolism                                      | 63 | 1 | 0.0070533 | 2.1516  | 0.077586 | 0.0095723 | 0 |
| 31 | Cyanoamino acid metabolism                             | 29 | 2 | 0.0095249 | 2.0211  | 0.095249 | 0.012481  | 0 |
| 32 | Selenocompound metabolism                              | 13 | 1 | 0.01013   | 1.9944  | 0.095249 | 0.012832  | 0 |
| 33 | Pantothenate and CoA biosynthesis                      | 23 | 1 | 0.32916   | 0.4826  | 1        | 0.39087   | 0 |
| 34 | Phenylpropanoid biosynthesis                           | 46 | 1 | 0.3835    | 0.41624 | 1        | 0.41637   | 0 |
| 35 | Tropane, piperidine and pyridine alkaloid biosynthesis | 8  | 1 | 0.3835    | 0.41624 | 1        | 0.41637   | 0 |
| 36 | Valine, leucine and isoleucine degradation             | 37 | 3 | 0.40154   | 0.39627 | 1        | 0.42385   | 0 |
| 37 | Glucosinolate biosynthesis                             | 65 | 4 | 0.42835   | 0.3682  | 1        | 0.43993   | 0 |
| 38 | Valine, leucine and isoleucine biosynthesis            | 22 | 4 | 0.46672   | 0.33094 | 1        | 0.46672   | 0 |

**Table S4.** Table S3. Uvaia classifications according to their physicochemical characteristics - Class 2: S, FW, D and H. Accession 7 and 8.

|    |                                                        | Total Cmpd | Hits | Raw p      | $-\text{LOG}_{10}(\text{p})$ | Holm adjust | FDR       | Impact  |
|----|--------------------------------------------------------|------------|------|------------|------------------------------|-------------|-----------|---------|
| 1  | Isoquinoline alkaloid biosynthesis                     | 6          | 1    | 0.52673    | 0.27841                      | 1           | 0.57188   | 0.5     |
| 2  | Phenylalanine metabolism                               | 11         | 1    | 9.20E-06   | 5.0364                       | 0.00034026  | 7.18E-05  | 0.47059 |
| 3  | Alanine, aspartate and glutamate metabolism            | 22         | 4    | 0.0034762  | 2.4589                       | 0.097334    | 0.012009  | 0.32014 |
| 4  | Citrate cycle (TCA cycle)                              | 20         | 3    | 0.36108    | 0.4424                       | 1           | 0.47314   | 0.18889 |
| 5  | Arginine and proline metabolism                        | 34         | 2    | 0.10968    | 0.95987                      | 1           | 0.20661   | 0.17461 |
| 6  | Pyruvate metabolism                                    | 22         | 1    | 0.88676    | 0.052191                     | 1           | 0.90561   | 0.15462 |
| 7  | Glycine, serine and threonine metabolism               | 33         | 3    | 0.040386   | 1.3938                       | 1           | 0.10962   | 0.1204  |
| 8  | Tyrosine metabolism                                    | 16         | 1    | 0.52673    | 0.27841                      | 1           | 0.57188   | 0.10811 |
| 9  | Starch and sucrose metabolism                          | 22         | 1    | 0.46412    | 0.33337                      | 1           | 0.55739   | 0.0889  |
| 10 | Arginine biosynthesis                                  | 18         | 3    | 9.45E-06   | 5.0247                       | 0.00034026  | 7.18E-05  | 0.08447 |
| 11 | Glyoxylate and dicarboxylate metabolism                | 29         | 5    | 0.018843   | 1.7249                       | 0.48991     | 0.055079  | 0.06741 |
| 12 | Carbon fixation in photosynthetic organisms            | 21         | 3    | 0.46938    | 0.32847                      | 1           | 0.55739   | 0.05846 |
| 13 | Galactose metabolism                                   | 27         | 1    | 0.46412    | 0.33337                      | 1           | 0.55739   | 0.04252 |
| 14 | Sulfur metabolism                                      | 15         | 1    | 0.12224    | 0.9128                       | 1           | 0.20661   | 0.03315 |
|    |                                                        |            |      |            |                              |             | 0.0002742 |         |
| 15 | Pyrimidine metabolism                                  | 38         | 2    | 4.35E-05   | 4.3612                       | 0.0014367   | 7         | 0.03089 |
| 16 | Glycerophospholipid metabolism                         | 37         | 1    | 0.90561    | 0.043061                     | 1           | 0.90561   | 0.03075 |
|    |                                                        |            |      |            |                              |             | 0.0003062 |         |
| 17 | Phenylalanine, tyrosine and tryptophan biosynthesis    | 22         | 2    | 6.45E-05   | 4.1906                       | 0.0019986   | 3         | 0.02152 |
| 18 | Glycolysis / Gluconeogenesis                           | 26         | 2    | 0.068613   | 1.1636                       | 1           | 0.16296   | 0.00038 |
| 19 | Purine metabolism                                      | 63         | 1    | 6.17E-06   | 5.21                         | 0.00023431  | 7.18E-05  | 0       |
| 20 | Phenylpropanoid biosynthesis                           | 46         | 1    | 9.20E-06   | 5.0364                       | 0.00034026  | 7.18E-05  | 0       |
| 21 | Tropane, piperidine and pyridine alkaloid biosynthesis | 8          | 1    | 9.20E-06   | 5.0364                       | 0.00034026  | 7.18E-05  | 0       |
|    |                                                        |            |      |            |                              |             | 0.0002742 |         |
| 22 | Cyanoamino acid metabolism                             | 29         | 2    | 5.05E-05   | 4.2965                       | 0.0016168   | 7         | 0       |
| 23 | Nitrogen metabolism                                    | 12         | 2    | 0.00030299 | 3.5186                       | 0.0090897   | 0.0012793 | 0       |
| 24 | Aminoacyl-tRNA biosynthesis                            | 46         | 11   | 0.0014055  | 2.8522                       | 0.040759    | 0.0053408 | 0       |
| 25 | Glucosinolate biosynthesis                             | 65         | 4    | 0.010784   | 1.9672                       | 0.29117     | 0.034149  | 0       |

---

|    |                                                     |    |   |          |          |   |         |   |
|----|-----------------------------------------------------|----|---|----------|----------|---|---------|---|
| 26 | Valine, leucine and isoleucine biosynthesis         | 22 | 4 | 0.060033 | 1.2216   | 1 | 0.15208 | 0 |
| 27 | Propanoate metabolism                               | 20 | 1 | 0.12224  | 0.9128   | 1 | 0.20661 | 0 |
| 28 | Butanoate metabolism                                | 17 | 1 | 0.12224  | 0.9128   | 1 | 0.20661 | 0 |
| 29 | Pantothenate and CoA biosynthesis                   | 23 | 1 | 0.13602  | 0.8664   | 1 | 0.20661 | 0 |
| 30 | Monobactam biosynthesis                             | 8  | 1 | 0.14136  | 0.84966  | 1 | 0.20661 | 0 |
| 31 | Cysteine and methionine metabolism                  | 46 | 1 | 0.14136  | 0.84966  | 1 | 0.20661 | 0 |
| 32 | Lysine biosynthesis                                 | 9  | 1 | 0.14136  | 0.84966  | 1 | 0.20661 | 0 |
| 33 | beta-Alanine metabolism                             | 18 | 1 | 0.14136  | 0.84966  | 1 | 0.20661 | 0 |
| 34 | Nicotinate and nicotinamide metabolism              | 13 | 1 | 0.14136  | 0.84966  | 1 | 0.20661 | 0 |
| 35 | Amino sugar and nucleotide sugar metabolism         | 50 | 1 | 0.16641  | 0.77882  | 1 | 0.23421 | 0 |
| 36 | Valine, leucine and isoleucine degradation          | 37 | 3 | 0.19649  | 0.70666  | 1 | 0.26667 | 0 |
| 37 | Ubiquinone and other terpenoid-quinone biosynthesis | 38 | 1 | 0.52673  | 0.27841  | 1 | 0.57188 | 0 |
| 38 | Selenocompound metabolism                           | 13 | 1 | 0.7951   | 0.099577 | 1 | 0.83928 | 0 |

Table S5. Table S3. Uvaia classifications according to their physicochemical characteristics - Class 3: TTA. Accessions 3,5,6,9,10.

|    |                                                     | Total Cmpd | Hits | Raw p      | _ $-\text{LOG}_{10}(\text{p})$ | Holm adjust | FDR        | Impact  |
|----|-----------------------------------------------------|------------|------|------------|--------------------------------|-------------|------------|---------|
| 1  | Isoquinoline alkaloid biosynthesis                  | 6          | 1    | 0.0020404  | 2.6903                         | 0.042848    | 0.0038767  | 0.5     |
| 2  | Phenylalanine metabolism                            | 11         | 1    | 0.012262   | 1.9114                         | 0.14714     | 0.016067   | 0.47059 |
| 3  | Alanine, aspartate and glutamate metabolism         | 22         | 4    | 1.04E-05   | 4.9817                         | 0.00035467  | 7.93E-05   | 0.32014 |
| 4  | Citrate cycle (TCA cycle)                           | 20         | 3    | 0.00025308 | 3.5967                         | 0.0060739   | 0.00064114 | 0.18889 |
| 5  | Arginine and proline metabolism                     | 34         | 2    | 0.57324    | 0.24166                        | 1           | 0.58873    | 0.17461 |
| 6  | Pyruvate metabolism                                 | 22         | 1    | 0.0027451  | 2.5614                         | 0.049413    | 0.0049674  | 0.15462 |
| 7  | Glycine, serine and threonine metabolism            | 33         | 3    | 8.29E-05   | 4.0814                         | 0.0022385   | 0.00026254 | 0.1204  |
| 8  | Tyrosine metabolism                                 | 16         | 1    | 0.0020404  | 2.6903                         | 0.042848    | 0.0038767  | 0.10811 |
| 9  | Starch and sucrose metabolism                       | 22         | 1    | 0.0088299  | 2.054                          | 0.13667     | 0.013421   | 0.0889  |
| 10 | Arginine biosynthesis                               | 18         | 3    | 0.00090591 | 3.0429                         | 0.020836    | 0.0021515  | 0.08447 |
| 11 | Glyoxylate and dicarboxylate metabolism             | 29         | 5    | 0.00018738 | 3.7273                         | 0.0046844   | 0.0005086  | 0.06741 |
| 12 | Carbon fixation in photosynthetic organisms         | 21         | 3    | 5.95E-05   | 4.2258                         | 0.0016648   | 0.00020539 | 0.05846 |
| 13 | Galactose metabolism                                | 27         | 1    | 0.0088299  | 2.054                          | 0.13667     | 0.013421   | 0.04252 |
| 14 | Sulfur metabolism                                   | 15         | 1    | 5.27E-06   | 5.2782                         | 0.00020026  | 6.31E-05   | 0.03315 |
| 15 | Pyrimidine metabolism                               | 38         | 2    | 0.014924   | 1.8261                         | 0.14714     | 0.018904   | 0.03089 |
| 16 | Glycerophospholipid metabolism                      | 37         | 1    | 0.05386    | 1.2687                         | 0.32316     | 0.06202    | 0.03075 |
| 17 | Phenylalanine, tyrosine and tryptophan biosynthesis | 22         | 2    | 0.00010548 | 3.9768                         | 0.0027425   | 0.00030833 | 0.02152 |
| 18 | Glycolysis / Gluconeogenesis                        | 26         | 2    | 0.010472   | 1.98                           | 0.13667     | 0.015305   | 0.00038 |
| 19 | Propanoate metabolism                               | 20         | 1    | 5.27E-06   | 5.2782                         | 0.00020026  | 6.31E-05   | 0       |
| 20 | Butanoate metabolism                                | 17         | 1    | 5.27E-06   | 5.2782                         | 0.00020026  | 6.31E-05   | 0       |
| 21 | Cyanoamino acid metabolism                          | 29         | 2    | 6.65E-06   | 5.1774                         | 0.00023262  | 6.31E-05   | 0       |
| 22 | Monobactam biosynthesis                             | 8          | 1    | 3.72E-05   | 4.43                           | 0.0012262   | 0.0001412  | 0       |
| 23 | Cysteine and methionine metabolism                  | 46         | 1    | 3.72E-05   | 4.43                           | 0.0012262   | 0.0001412  | 0       |
| 24 | Lysine biosynthesis                                 | 9          | 1    | 3.72E-05   | 4.43                           | 0.0012262   | 0.0001412  | 0       |
| 25 | beta-Alanine metabolism                             | 18         | 1    | 3.72E-05   | 4.43                           | 0.0012262   | 0.0001412  | 0       |
| 26 | Nicotinate and nicotinamide metabolism              | 13         | 1    | 3.72E-05   | 4.43                           | 0.0012262   | 0.0001412  | 0       |
| 27 | Aminoacyl-tRNA biosynthesis                         | 46         | 11   | 0.0014299  | 2.8447                         | 0.031457    | 0.0031962  | 0       |

---

|    |                                                        |    |   |           |         |          |           |   |
|----|--------------------------------------------------------|----|---|-----------|---------|----------|-----------|---|
| 28 | Ubiquinone and other terpenoid-quinone biosynthesis    | 38 | 1 | 0.0020404 | 2.6903  | 0.042848 | 0.0038767 | 0 |
| 29 | Amino sugar and nucleotide sugar metabolism            | 50 | 1 | 0.0051765 | 2.286   | 0.088    | 0.0089411 | 0 |
| 30 | Nitrogen metabolism                                    | 12 | 2 | 0.0085419 | 2.0684  | 0.13667  | 0.013421  | 0 |
| 31 | Phenylpropanoid biosynthesis                           | 46 | 1 | 0.012262  | 1.9114  | 0.14714  | 0.016067  | 0 |
| 32 | Tropane, piperidine and pyridine alkaloid biosynthesis | 8  | 1 | 0.012262  | 1.9114  | 0.14714  | 0.016067  | 0 |
| 33 | Selenocompound metabolism                              | 13 | 1 | 0.018326  | 1.7369  | 0.14714  | 0.022464  | 0 |
| 34 | Valine, leucine and isoleucine biosynthesis            | 22 | 4 | 0.045305  | 1.3439  | 0.31713  | 0.053799  | 0 |
| 35 | Glucosinolate biosynthesis                             | 65 | 4 | 0.062311  | 1.2054  | 0.32316  | 0.069641  | 0 |
| 36 | Valine, leucine and isoleucine degradation             | 37 | 3 | 0.16542   | 0.7814  | 0.66169  | 0.1796    | 0 |
| 37 | Purine metabolism                                      | 63 | 1 | 0.30398   | 0.51715 | 0.91195  | 0.32087   | 0 |
| 38 | Pantothenate and CoA biosynthesis                      | 23 | 1 | 0.68062   | 0.1671  | 1        | 0.68062   | 0 |
